# Supplementary material for: Molecular Recognition in Complexes of TRF Proteins with Telomeric DNA
Source: PubMed Central journal article supplement (PMC3935891; doi:10.1371/journal.pone.0089460), 2014-02-26
Supplement: pone.0089460.s009.pdf [file pone.0089460.s009.pdf]

# Molecular Recognition in Complexes of TRF Proteins with Telomeric DNA

Miłosz Wieczór,<sup>†</sup> Adrian Tobiszewski,<sup>†</sup> Paweł Wityk,<sup>†</sup> Bartłomiej Tomiczek,<sup>‡</sup> and  
Jacek Czub<sup>\*,†</sup>

*Department of Physical Chemistry, Gdansk University of Technology,*

*ul. Narutowicza 11/12, 80-233 Gdansk, Poland, and*

*Department of Genetics, Evolution and Environment, University College London,*

*London, United Kingdom*

E-mail: [jacczub@pg.gda.pl](mailto:jacczub@pg.gda.pl)

## SUPPORTING INFORMATION

---

\*To whom correspondence should be addressed

<sup>†</sup>Department of Physical Chemistry, Faculty of Chemistry, Gdansk University of Technology, Gdansk, Poland

<sup>‡</sup>Department of Genetics, Evolution and Environment, University College London, London, United Kingdom

Tables S1-S8 present statistical data on direct and water-mediated hydrogen bonds between the TRF proteins and DNA. The results are sorted by protein (TRF1/TRF2), type of interaction (direct or water mediated hydrogen bond) and sequence-specificity (interaction with DNA bases or backbone). DNA base pairs are numbered consecutively as in the sequence 5'-GGTTAGGGTTAG-3', with a prime symbol (') indicating numeration of the complementary strand.

**Table S1: Direct hydrogen bonds between TRF1 and the telomeric DNA nucleobases.**

| Residues |         | Probability | Mean lifetime [ps] | Maximum lifetime [ps] |
|----------|---------|-------------|--------------------|-----------------------|
| DNA      | Protein |             |                    |                       |
| G6       | Lys-421 | 0.565       | 118.7 ± 2.9        | 4080                  |
| G7       | Arg-425 | 0.889       | 235.3 ± 7.3        | 7000                  |
| C7'      | Asp-422 | 0.519       | 162.7 ± 6.4        | 8420                  |
| C8'      | Asp-422 | 0.577       | 235 ± 15           | 16260                 |
| A10'     | Arg-380 | 0.437       | 169.7 ± 7.7        | 5720                  |
| T10      | Arg-380 | 0.425       | 381 ± 60           | 24060                 |
| 11A      | Arg-380 | 0.077       | 36.6 ± 2.1         | 1610                  |

**Table S2: Direct hydrogen bonds between TRF1 and the DNA sugar-phosphate backbone.**

| Residues |         | Probability | Mean lifetime [ps] | Maximum lifetime [ps] |
|----------|---------|-------------|--------------------|-----------------------|
| DNA      | Protein |             |                    |                       |
| T4       | Ser-404 | 0.998       | 6090 ± 910         | 81310                 |
| T4       | Ser-417 | 0.338       | 71.3 ± 3.8         | 8860                  |
| A5       | Lys-421 | 0.250       | 608 ± 38           | 4960                  |
| A5       | Trp-403 | 0.998       | 4280 ± 270         | 19590                 |
| G6       | Lys-421 | 0.183       | 84.5 ± 2.3         | 1210                  |
| C7'      | Lys-379 | 0.172       | 45.92 ± 0.97       | 780                   |
| C8'      | Arg-415 | 0.103       | 52.8 ± 5.8         | 6660                  |
| C8'      | Gln-381 | 0.594       | 43.6 ± 1.2         | 5600                  |
| A9'      | Arg-423 | 0.969       | 366 ± 12           | 8180                  |
| A9'      | Gln-381 | 0.440       | 29.41 ± 0.31       | 1130                  |
| A9'      | Thr-426 | 0.516       | 279 ± 12           | 5440                  |
| A9'      | Trp-383 | 0.293       | 81 ± 3             | 2390                  |
| A10'     | Arg-380 | 0.178       | 21.62 ± 0.22       | 470                   |
| A10'     | Lys-429 | 0.094       | 72.2 ± 2.5         | 910                   |
| T10      | Arg-380 | 0.055       | 11.96 ± 0.07       | 70                    |
| 12G      | Arg-380 | 0.557       | 93.2 ± 2.2         | 2570                  |
| 12G      | Lys-379 | 0.367       | 60.48 ± 0.92       | 1530                  |

Table S3: **Water-mediated hydrogen bonds between TRF1 and the telomeric DNA nucleobases.**

| Residues |         | Probability | Mean lifetime [ps] | Maximum lifetime [ps] |
|----------|---------|-------------|--------------------|-----------------------|
| DNA      | Protein |             |                    |                       |
| G6       | Lys-421 | 0.101       | 38.5 ± 1.5         | 1180                  |
| C7'      | Asp-422 | 0.092       | 16.57 ± 0.21       | 290                   |
| C7'      | Val-418 | 0.082       | 17.45 ± 0.21       | 170                   |
| G7       | Asp-422 | 0.078       | 38.7 ± 1.2         | 860                   |
| C8'      | Asp-422 | 0.129       | 20.79 ± 0.27       | 270                   |
| G8       | Asp-422 | 0.094       | 24.09 ± 0.45       | 340                   |
| A9'      | Arg-380 | 0.211       | 20.93 ± 0.24       | 460                   |
| A9'      | Asp-422 | 0.401       | 41.04 ± 0.69       | 1340                  |
| A9'      | Thr-426 | 0.060       | 19.51 ± 0.31       | 210                   |
| A10'     | Arg-380 | 0.053       | 12.86 ± 0.13       | 160                   |
| 11A      | Arg-380 | 0.066       | 13.39 ± 0.13       | 140                   |
| 11T'     | Arg-380 | 0.066       | 17.29 ± 0.32       | 410                   |

Table S4: **Water-mediated hydrogen bonds between TRF1 and the DNA sugar-phosphate backbone.**

| Residues |         | Probability | Mean lifetime [ps] | Maximum lifetime [ps] |
|----------|---------|-------------|--------------------|-----------------------|
| DNA      | Protein |             |                    |                       |
| T3       | Ser-404 | 0.532       | 26.07 ± 0.16       | 270                   |
| T4       | Asn-402 | 0.706       | 70.25 ± 0.92       | 1480                  |
| T4       | Gly-401 | 0.139       | 13.17 ± 0.07       | 120                   |
| T4       | Lys-405 | 0.072       | 18.36 ± 0.26       | 380                   |
| T4       | Ser-417 | 0.301       | 31.11 ± 0.35       | 520                   |
| A5       | Glu400  | 0.120       | 19.06 ± 0.30       | 410                   |
| A5       | Gly-401 | 0.081       | 12.53 ± 0.08       | 130                   |
| G6       | Arg-425 | 0.159       | 33.55 ± 0.78       | 1370                  |
| G6       | Lys-421 | 0.081       | 28.53 ± 0.56       | 310                   |
| C7'      | Lys-379 | 0.112       | 14.83 ± 0.12       | 150                   |
| G7       | Arg-425 | 0.127       | 18.19 ± 0.23       | 700                   |
| C8'      | Arg-380 | 0.066       | 13.48 ± 0.12       | 160                   |
| C8'      | Arg-415 | 0.312       | 24.98 ± 0.31       | 750                   |
| C8'      | Gln-381 | 0.589       | 53.98 ± 0.78       | 2140                  |
| C8'      | Lys-379 | 0.342       | 21.70 ± 0.15       | 280                   |
| C8'      | Trp-383 | 0.150       | 17.56 ± 0.18       | 280                   |
| A9'      | Arg-380 | 0.190       | 20.98 ± 0.18       | 200                   |
| A9'      | Arg-423 | 0.286       | 21.70 ± 0.17       | 240                   |
| A9'      | Asp-422 | 0.329       | 31.66 ± 0.52       | 1400                  |
| A9'      | Thr-426 | 0.226       | 39.0 ± 1.1         | 1360                  |
| A9'      | Trp-383 | 0.484       | 28.41 ± 0.30       | 860                   |
| A10'     | Arg-423 | 0.255       | 25.60 ± 0.31       | 440                   |
| A10'     | Lys-428 | 0.066       | 18.36 ± 0.31       | 400                   |
| A10'     | Lys-429 | 0.088       | 19.42 ± 0.25       | 180                   |
| A10'     | Thr-426 | 0.279       | 29.29 ± 0.35       | 580                   |
| 11A      | Ace-378 | 0.084       | 19.72 ± 0.25       | 160                   |
| 11A      | Arg-380 | 0.165       | 21.65 ± 0.21       | 220                   |
| 11A      | Lys-379 | 0.156       | 22.81 ± 0.24       | 220                   |
| 11T'     | Lys-429 | 0.083       | 20.65 ± 0.29       | 200                   |
| 12G      | Ace-378 | 0.164       | 18.44 ± 0.15       | 180                   |
| 12G      | Arg-380 | 0.452       | 25.21 ± 0.21       | 900                   |
| 12G      | Lys-379 | 0.170       | 21.16 ± 0.25       | 310                   |

Table S5: **Direct hydrogen bonds between TRF2 and the telomeric DNA nucleobases.**

| Residues |         | Probability | Mean lifetime [ps] | Maximum lifetime [ps] |
|----------|---------|-------------|--------------------|-----------------------|
| DNA      | Protein |             |                    |                       |
| A5       | Lys-488 | 0.485       | 44.90 ± 0.55       | 830                   |
| G6       | Lys-488 | 0.316       | 45.2 ± 1.2         | 2950                  |
| G7       | Arg-492 | 0.962       | 419 ± 14           | 8770                  |
| C7'      | Asp-489 | 0.606       | 111.6 ± 3.3        | 5820                  |
| C8'      | Asp-489 | 0.839       | 243.2 ± 7.3        | 10470                 |
| A9'      | Lys-447 | 0.143       | 23.33 ± 0.42       | 690                   |
| T10      | Lys-447 | 0.634       | 38.95 ± 0.34       | 860                   |
| 11A      | Lys-447 | 0.212       | 17.07 ± 0.15       | 270                   |

Table S6: **Direct hydrogen bonds between TRF2 and the DNA sugar-phosphate backbone.**

| Residues |         | Probability | Mean lifetime [ps] | Maximum lifetime [ps] |
|----------|---------|-------------|--------------------|-----------------------|
| DNA      | Protein |             |                    |                       |
| T4       | Ala-471 | 0.839       | 86.4 ± 1.1         | 1820                  |
| T4       | Trp-470 | 0.105       | 15.11 ± 0.18       | 360                   |
| A5       | Trp-470 | 0.996       | 2740 ± 160         | 18090                 |
| C7'      | Lys-446 | 0.070       | 55.0 ± 1.7         | 530                   |
| C8'      | Gln-448 | 0.577       | 39.80 ± 0.91       | 3530                  |
| C8'      | Trp-450 | 0.215       | 41.0 ± 1.1         | 1580                  |
| A9'      | Arg-490 | 0.879       | 272.1 ± 7.2        | 4090                  |
| A9'      | Gln-448 | 0.589       | 37.39 ± 0.38       | 810                   |
| A9'      | Lys-449 | 0.144       | 40.5 ± 1.2         | 2900                  |
| A9'      | Thr-493 | 0.188       | 101.3 ± 5.9        | 6090                  |
| A9'      | Trp-450 | 0.687       | 358 ± 22           | 12460                 |
| A10'     | Arg-496 | 0.732       | 1350 ± 120         | 22440                 |
| A10'     | Lys-449 | 0.057       | 20.01 ± 0.31       | 160                   |
| 11A      | Lys-447 | 0.405       | 23.44 ± 0.16       | 310                   |
| 12G      | Lys-446 | 0.377       | 64.50 ± 0.99       | 710                   |
| 12G      | Lys-447 | 0.714       | 64.39 ± 0.92       | 2470                  |

Table S7: **Water-mediated hydrogen bonds between TRF2 and the telomeric DNA nucleobases.**

| Residues |         | Probability | Mean lifetime [ps] | Maximum lifetime [ps] |
|----------|---------|-------------|--------------------|-----------------------|
| DNA      | Protein |             |                    |                       |
| A5       | Lys-488 | 0.242       | 18.27 ± 0.13       | 230                   |
| G6       | Asp-489 | 0.242       | 22.91 ± 0.21       | 240                   |
| G6       | Lys-488 | 0.178       | 16.78 ± 0.15       | 550                   |
| C7'      | Asp-489 | 0.077       | 16.30 ± 0.27       | 360                   |
| C7'      | Val-485 | 0.140       | 19.43 ± 0.18       | 170                   |
| G7       | Asp-489 | 0.072       | 33.0 ± 1.2         | 800                   |
| C8'      | Asp-489 | 0.061       | 20.07 ± 0.35       | 200                   |
| C8'      | Lys-447 | 0.074       | 24.68 ± 0.47       | 360                   |
| G8       | Arg-496 | 0.134       | 39.26 ± 0.71       | 350                   |
| A9'      | Arg-496 | 0.183       | 18.15 ± 0.15       | 280                   |
| A9'      | Asp-489 | 0.257       | 37.51 ± 0.78       | 1600                  |
| A9'      | Thr-493 | 0.112       | 19.19 ± 0.23       | 260                   |
| A10'     | Lys-447 | 0.051       | 21.48 ± 0.44       | 290                   |

Table S8: **Water-mediated hydrogen bonds between TRF2 and the DNA sugar-phosphate backbone.**

| Residues |         | Probability | Mean lifetime [ps] | Maximum lifetime [ps] |
|----------|---------|-------------|--------------------|-----------------------|
| DNA      | Protein |             |                    |                       |
| T3       | Lys-475 | 0.273       | 22.20 ± 0.16       | 230                   |
| T4       | Ala-484 | 0.172       | 15.04 ± 0.09       | 140                   |
| T4       | Asn-469 | 0.511       | 33.20 ± 0.31       | 710                   |
| T4       | Gly-468 | 0.172       | 14.13 ± 0.08       | 120                   |
| A5       | Glu-467 | 0.327       | 25.83 ± 0.30       | 610                   |
| G6       | Lys-495 | 0.059       | 14.81 ± 0.17       | 130                   |
| C7'      | Lys-446 | 0.121       | 14.92 ± 0.12       | 150                   |
| G7       | Arg-492 | 0.102       | 17.05 ± 0.16       | 140                   |
| C8'      | Arg-482 | 0.654       | 58.03 ± 0.72       | 1240                  |
| C8'      | Gln-448 | 0.287       | 29.54 ± 0.48       | 940                   |
| C8'      | Lys-446 | 0.445       | 23.66 ± 0.16       | 330                   |
| C8'      | Lys-447 | 0.145       | 16.98 ± 0.14       | 160                   |
| C8'      | Trp-450 | 0.104       | 18.24 ± 0.33       | 650                   |
| A9'      | Arg-490 | 0.246       | 35.04 ± 0.62       | 1160                  |
| A9'      | Asp-489 | 0.113       | 27.55 ± 0.92       | 970                   |
| A9'      | Lys-449 | 0.061       | 16.11 ± 0.22       | 270                   |
| A9'      | Thr-493 | 0.595       | 132.6 ± 4.6        | 4460                  |
| A9'      | Trp-450 | 0.495       | 33.74 ± 0.30       | 370                   |
| A10'     | Arg-496 | 0.217       | 18.15 ± 0.17       | 430                   |
| A10'     | Lys-449 | 0.067       | 16.27 ± 0.22       | 190                   |
| A10'     | Thr-493 | 0.122       | 25.99 ± 0.47       | 750                   |
| 11A      | Ace-445 | 0.200       | 20.76 ± 0.18       | 210                   |
| 11A      | Lys-446 | 0.083       | 21.31 ± 0.27       | 130                   |
| 11T'     | Arg-496 | 0.072       | 30.83 ± 0.73       | 280                   |
| 12G      | Ace-445 | 0.285       | 27.70 ± 0.24       | 250                   |
| 12G      | Lys-446 | 0.127       | 16.71 ± 0.17       | 320                   |
| 12G      | Lys-447 | 0.543       | 26.96 ± 0.17       | 430                   |
| 12G      | Lys-449 | 0.066       | 12.90 ± 0.09       | 80                    |
